# Supplementary material for: Two octanuclear gallium metallamacrocycles of topologically different connectivities
Source: Royal Society of Chemistry journal article supplement (doi:10.1039/b710531b), 2007-01-01
Supplement: b710531b.pdf [file b710531b.pdf]

## Supporting Information

### Two octanuclear gallium metallamacrocycles with topologically different connectivities

Mira Park,<sup>a</sup> Rohith P. John,<sup>a</sup> Dohyun Moon,<sup>a</sup> Kyungjin Lee,<sup>a</sup> Ghyung Hwa Kim,<sup>b</sup> and Myoung Soo Lah<sup>a\*</sup>

<sup>a</sup> *Department of Chemistry and Applied Chemistry, College of Science and Technology,  
Hanyang University, Ansan, Kyunggi-do 426-791, Korea,*

*E-mail: [mslah@hanyang.ac.kr](mailto:mslah@hanyang.ac.kr)*

<sup>b</sup> *Pohang Accelerator Laboratory, Pohang, Kyungbook 790-784, Korea*

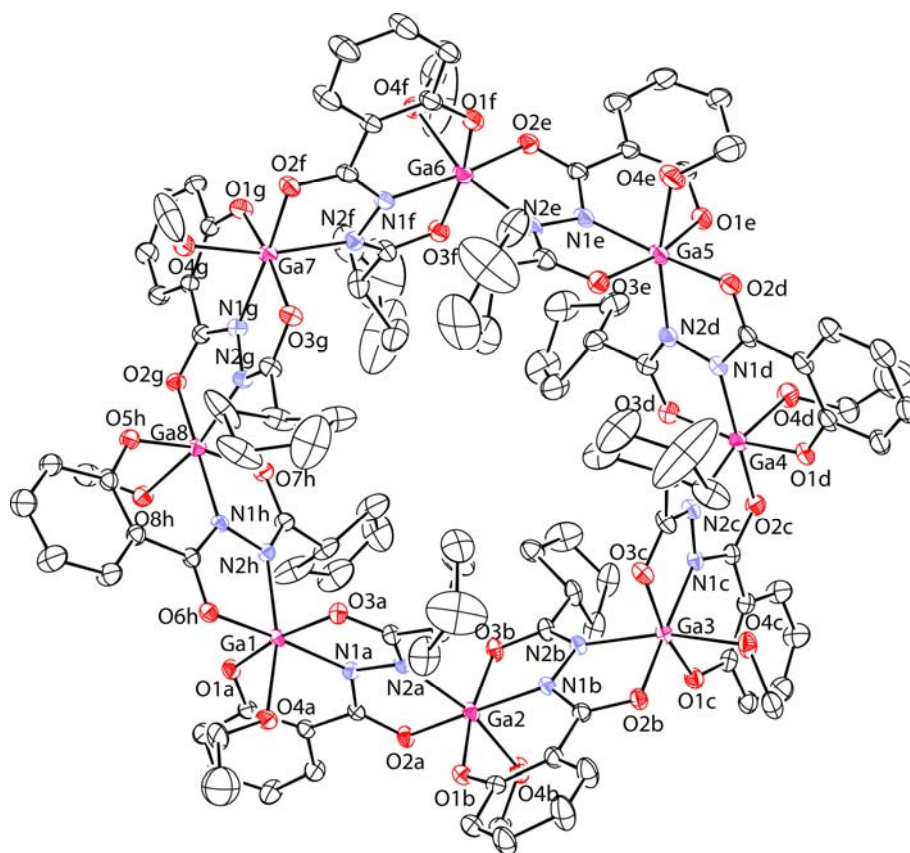

Figure S1. An ORTEP diagram of the  $S_8$  symmetric 24-membered octanuclear gallium(III) metallamacrocyclic **1** with the numbering for the heteroatoms.

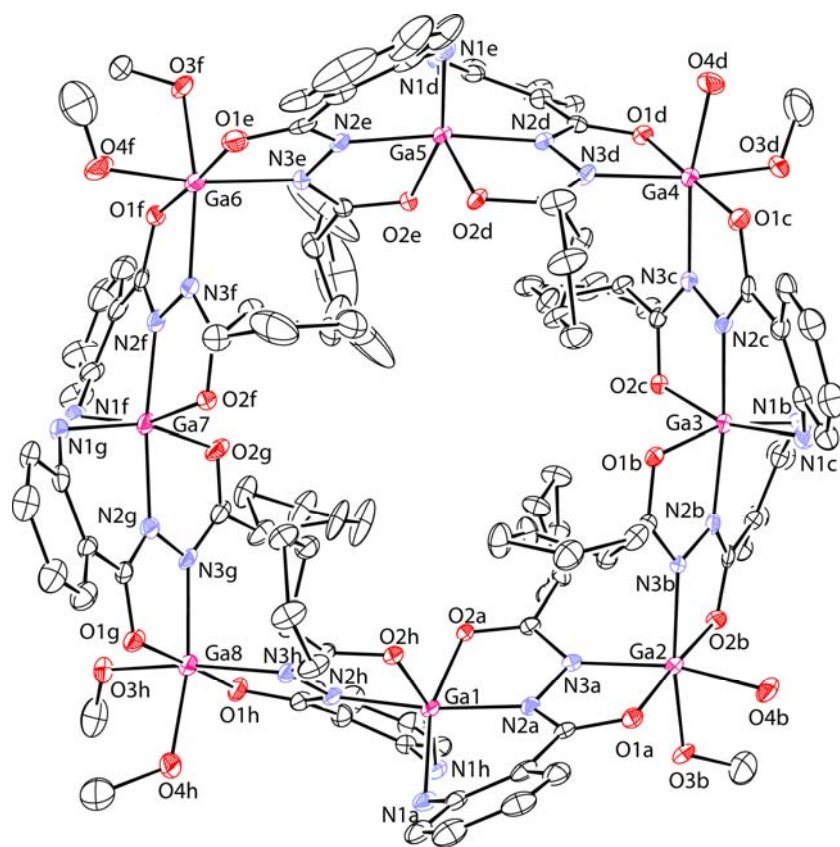

Figure S2. An ORTEP diagram of the pseudo- $D_4$  symmetric 24-membered octanuclear gallium(III) metallamacrocyclic **2** with the numbering for the heteroatoms.

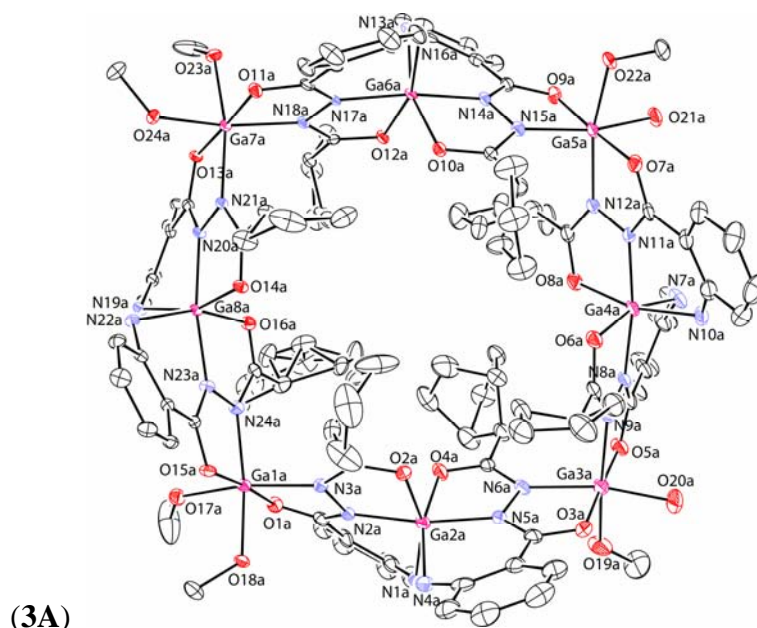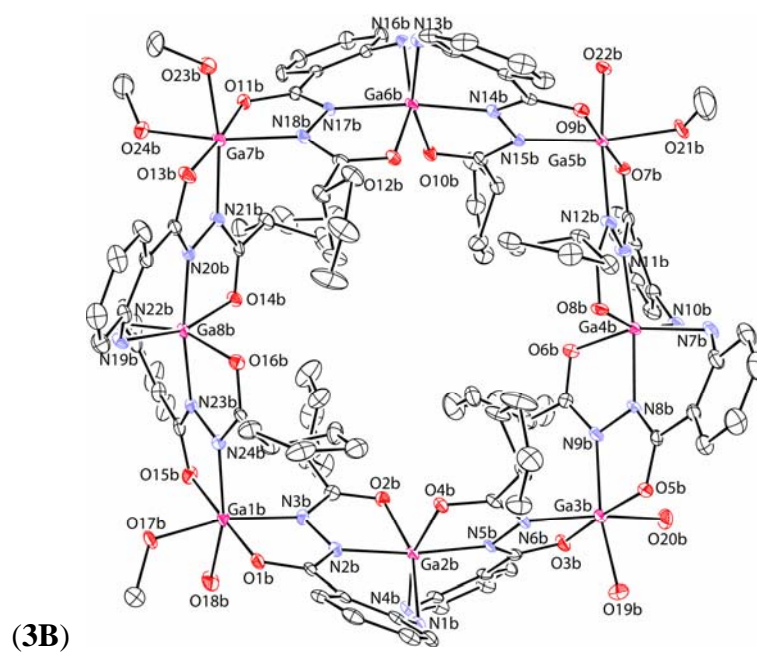

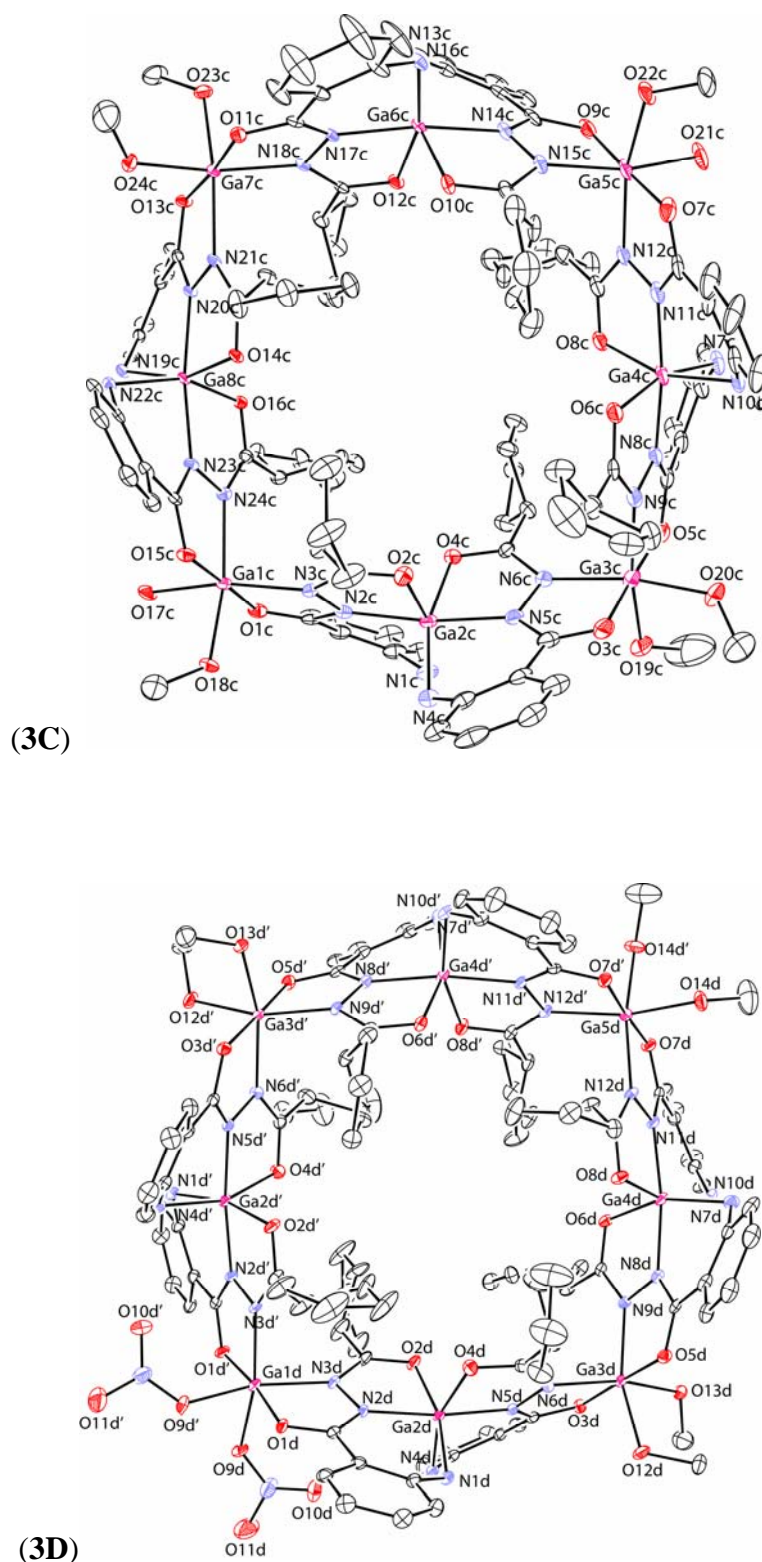

Figure S3. ORTEP diagrams of four different pseudo- $D_4$  symmetric 24-membered octanuclear gallium(III) metallamacrocycles, **3A** – **3D**, with the numbering for the heteroatoms.

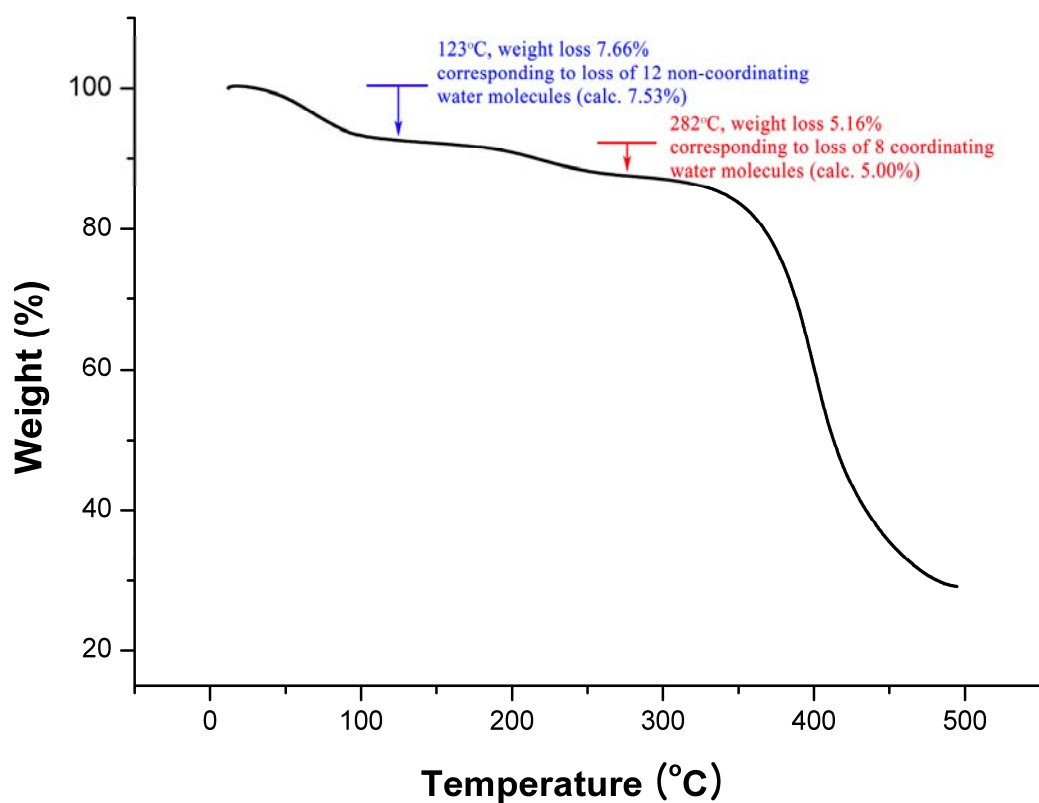

Figure S4. A TGA curve for complex **1**.

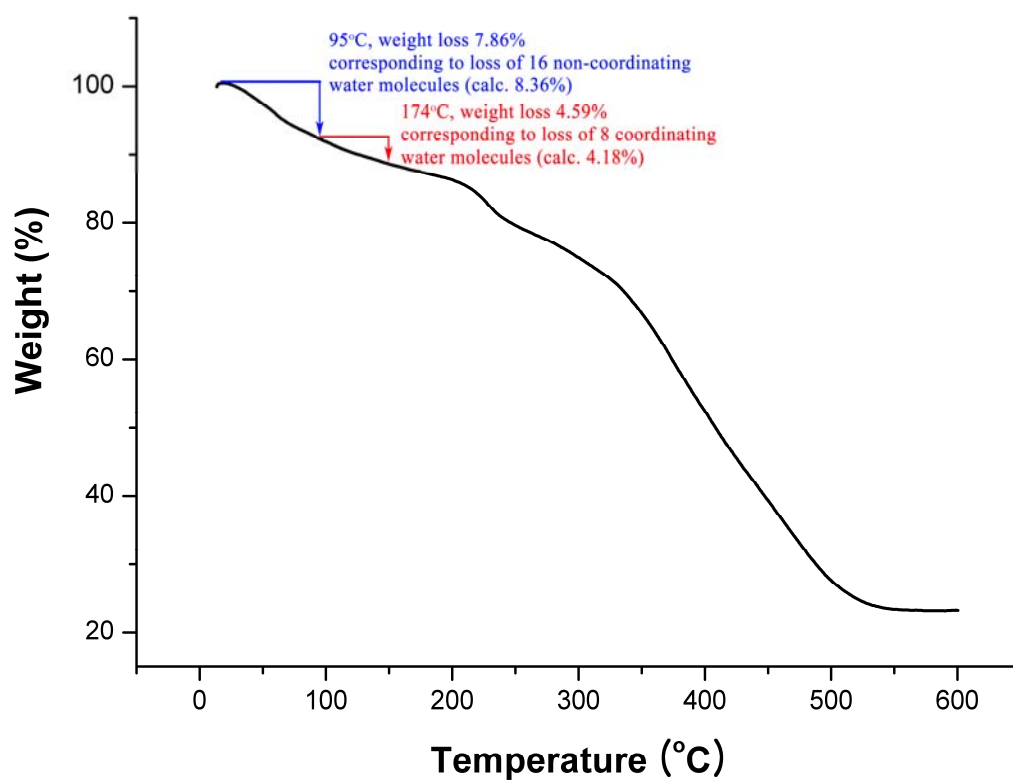

Figure S5. A TGA curve for mixture of complex 2 and 3.
